# Supplementary material for: The Marine Fungal Metabolite, Dicitrinone B, Induces A375 Cell Apoptosis through the ROS-Related Caspase Pathway
Source: PubMed Central journal article supplement (PMC4012433; doi:10.3390/md12041939), 2014-04-02

## Supplementary Information

**Figure S1.** The purity analysis of dicitrinone B by HPLC. **(A)** 80% MeCN/H<sub>2</sub>O, 0.1% TFA, 343 nm. **(B)** 80% MeCN/H<sub>2</sub>O, 0.1% TFA, 201 nm. **(C)** 80% MeCN/H<sub>2</sub>O, 0.1% TFA, DAD.

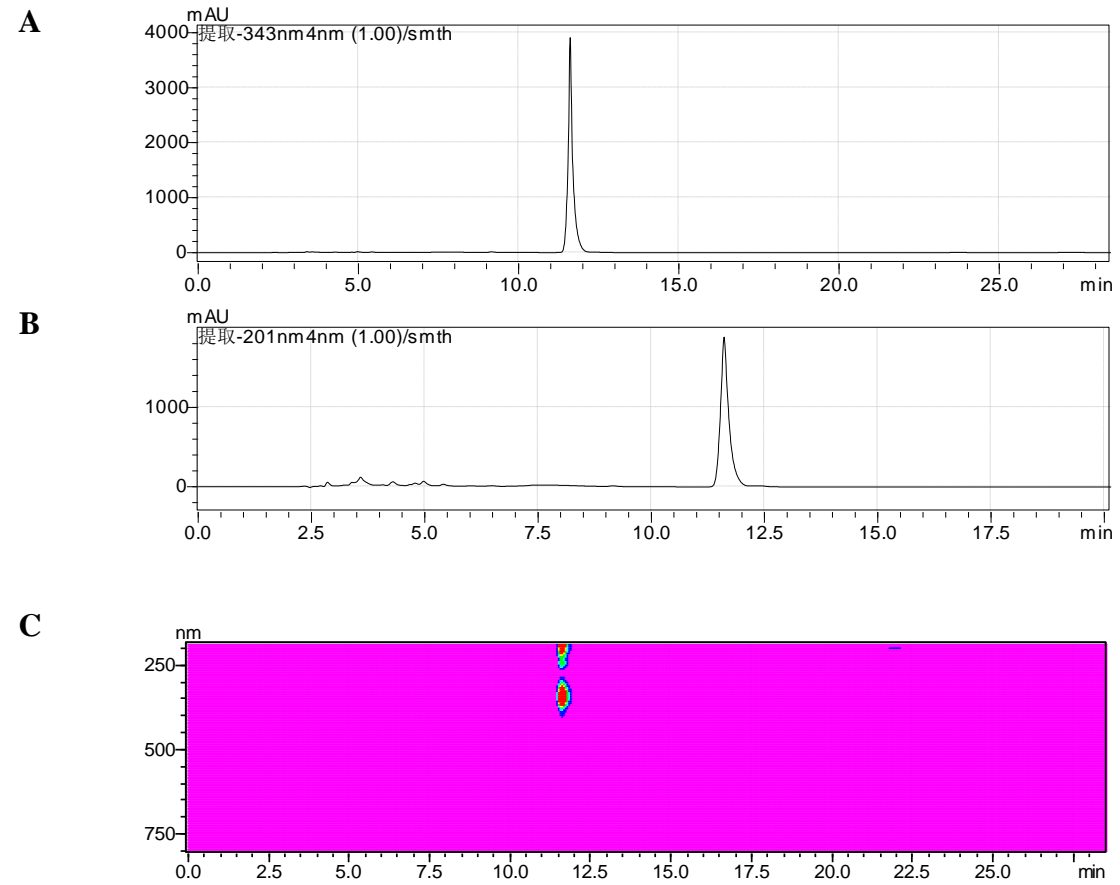

Figure S2. HRESIMS spectrum of dicitrinone B.

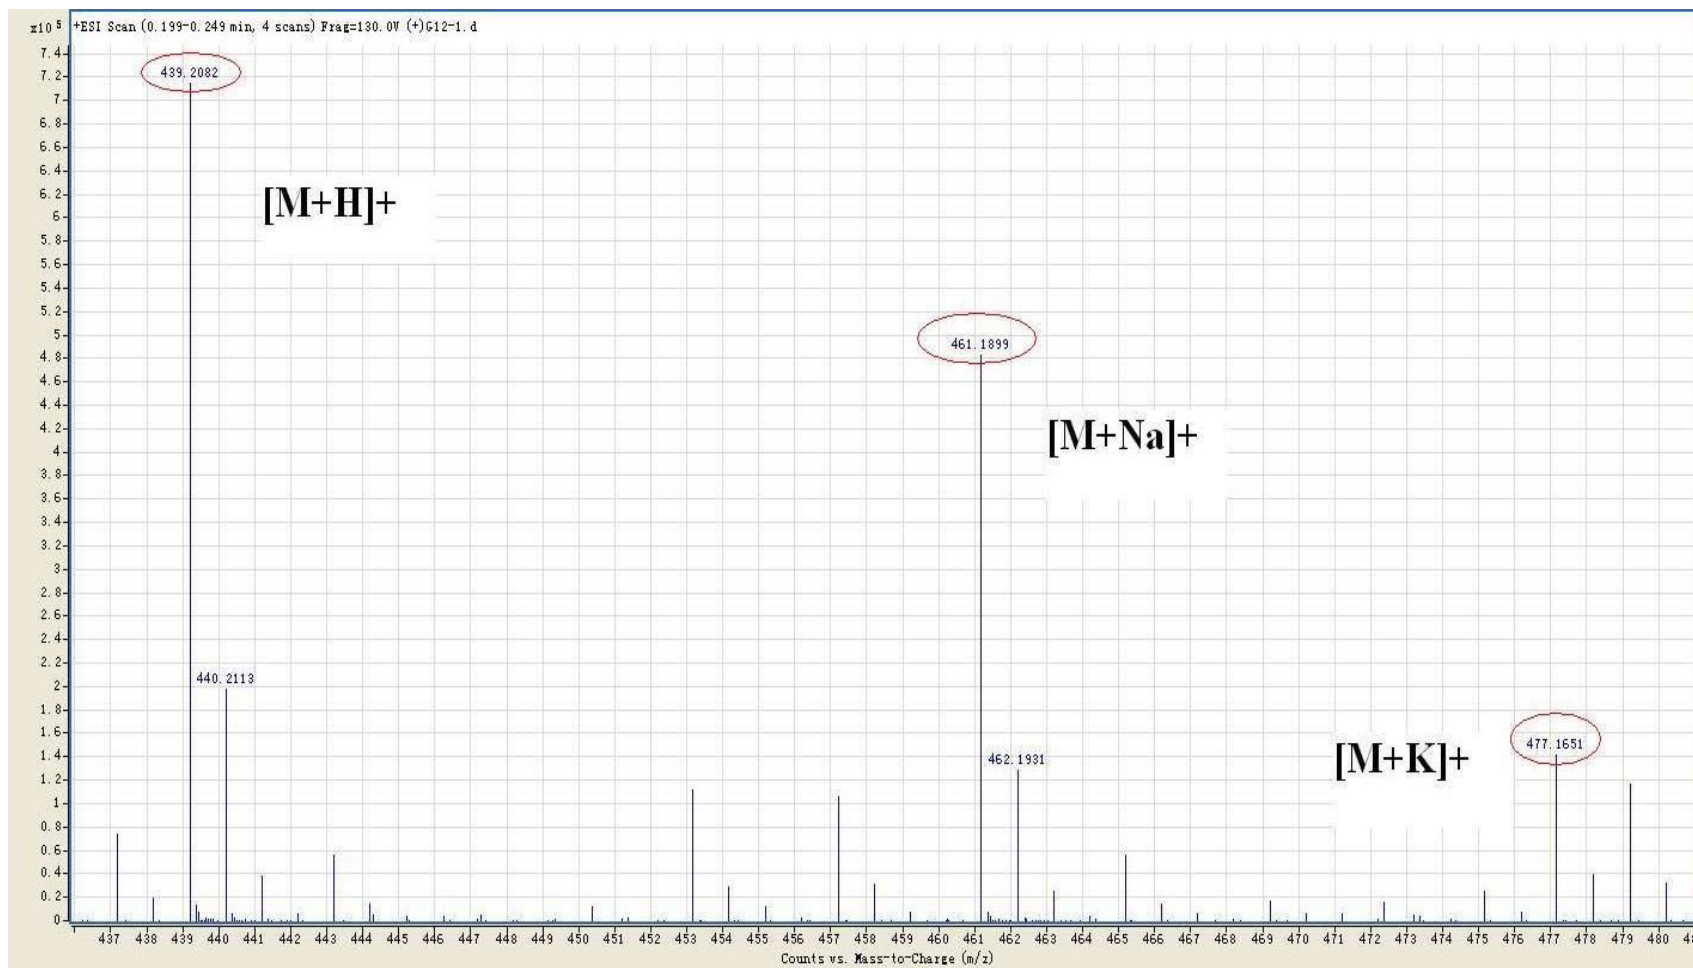

**Figure S3.**  $^1\text{H}$  NMR (500 MHz,  $\text{DMSO-}d_6$ ) spectrum of dicitrinone B.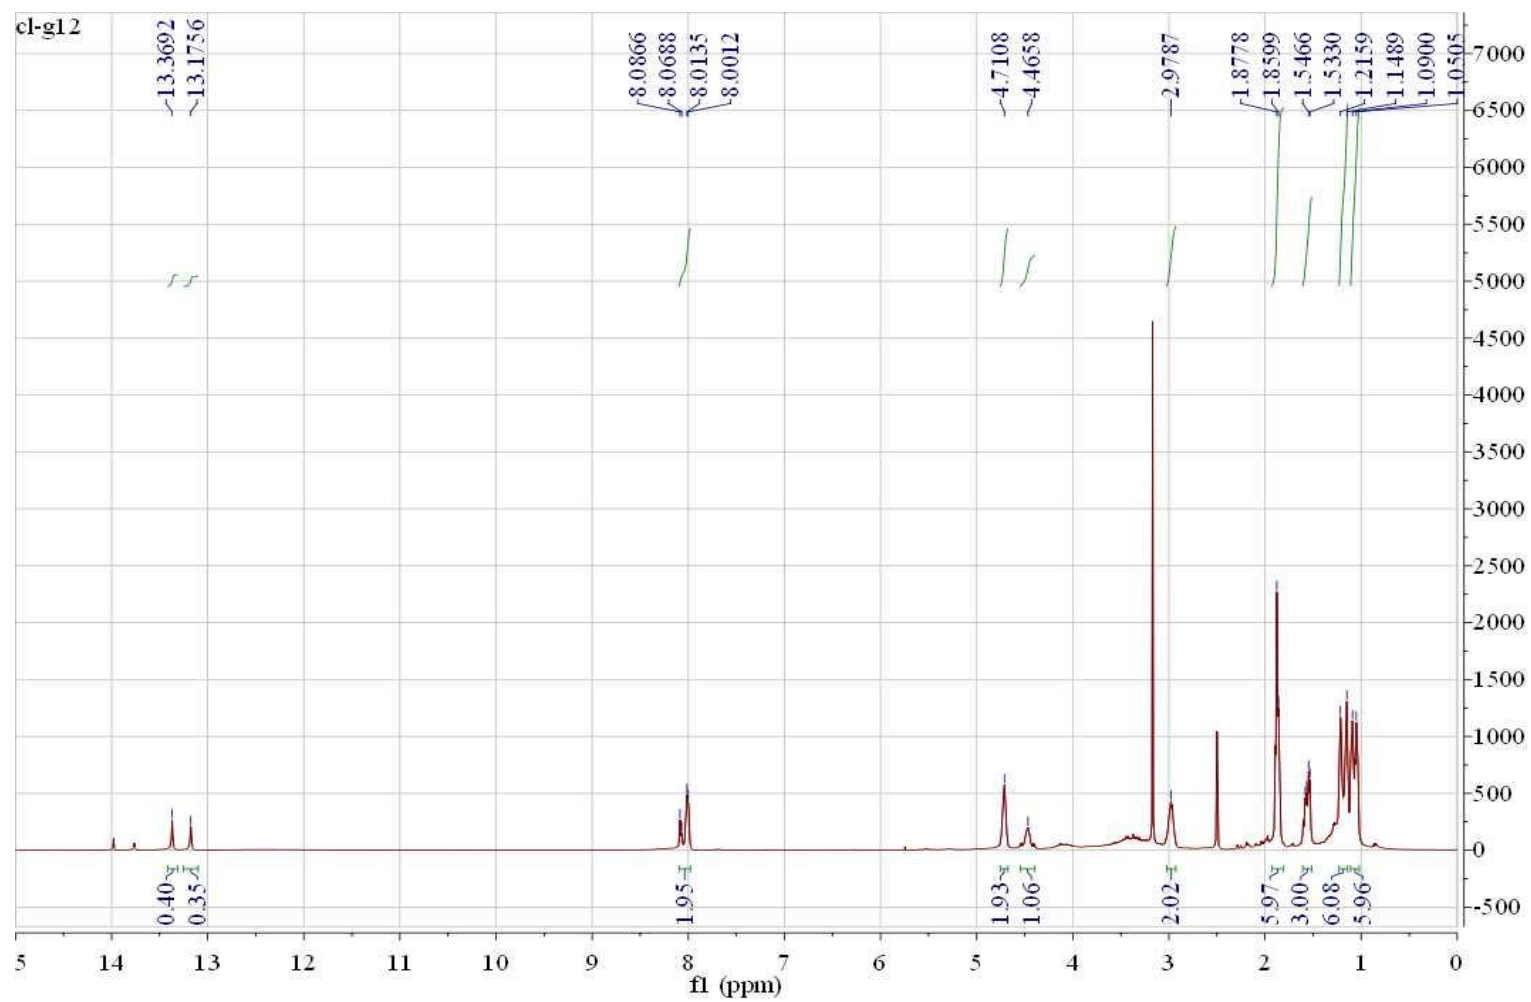

**Figure S4.**  $^{13}\text{C}$  NMR (125 MHz,  $\text{DMSO}-d_6$ ) spectrum of dicitrinone B.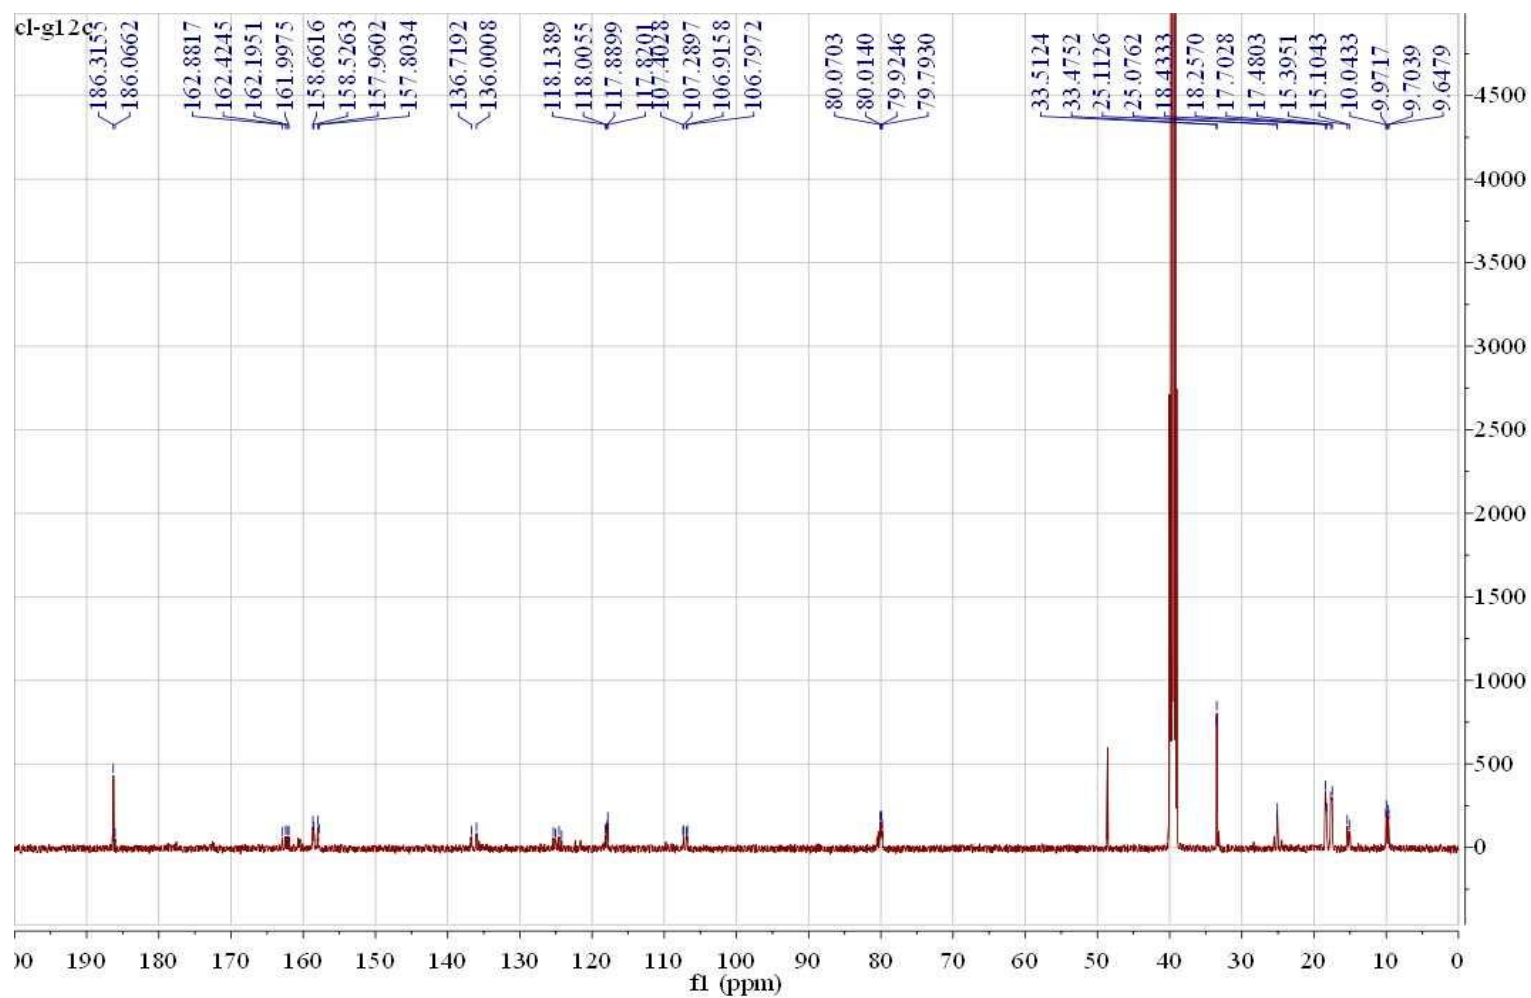

Supplement: marinedrugs-12-01939-s001.pdf [file marinedrugs-12-01939-s001.pdf]
